# Supplementary material for: Integrating phenotype ontologies across multiple species
Source: Springer Nature journal article supplement (doi:10.1186/gb-2010-11-1-r2), 2010-01-08
Supplement: 13059_2009_2295_MOESM1_ESM.pdf [file 13059_2009_2295_MOESM1_ESM.pdf]

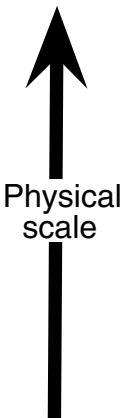

|              |                                          |               |               |                                                  |                |                |               |
|--------------|------------------------------------------|---------------|---------------|--------------------------------------------------|----------------|----------------|---------------|
| Anatomical   | FMA<br>(human)                           | MA<br>(mouse) | ZFA<br>(fish) | FBbt<br>(fly)                                    | WBbt<br>(worm) | APO<br>(fungi) | PO<br>(plant) |
|              | EHDA                                     | EMAP          |               |                                                  |                |                |               |
| Cellular     | CL (Cell)                                |               |               |                                                  |                |                |               |
| Sub-Cellular | GO-CC (Gene Ontology Cellular Component) |               |               |                                                  |                |                |               |
| Molecular    | PRO (PROteins)                           |               |               | CHEBI (Chemical Entities of Biological Interest) |                |                |               |
