# Supplementary material for: Integrating phenotype ontologies across multiple species
Source: Springer Nature journal article supplement (doi:10.1186/gb-2010-11-1-r2), 2010-01-08
Supplement: 13059_2009_2295_MOESM4_ESM.pdf [file 13059_2009_2295_MOESM4_ESM.pdf]

**a)**

MP: abnormal tooth morphology

is\_a

MP: abnormal tooth development

**b)**

MP: abnormal tooth morphology

E: tooth (MA)  
Q: morphology  
M: abnormal

MP: abnormal tooth development

E: odontogenesis (GO-BP)  
Q: quality  
M: abnormal

**c)**

GO-BP: developmental process

UBERON: tooth

is\_a

has participant

GO-BP: odontogenesis

**d)**

UBERON: tooth

is\_a

MA: tooth
