# Supplementary figures and images for: Integrating phenotype ontologies across multiple species
Source: Springer Nature journal article supplement (doi:10.1186/gb-2010-11-1-r2), 2010-01-08

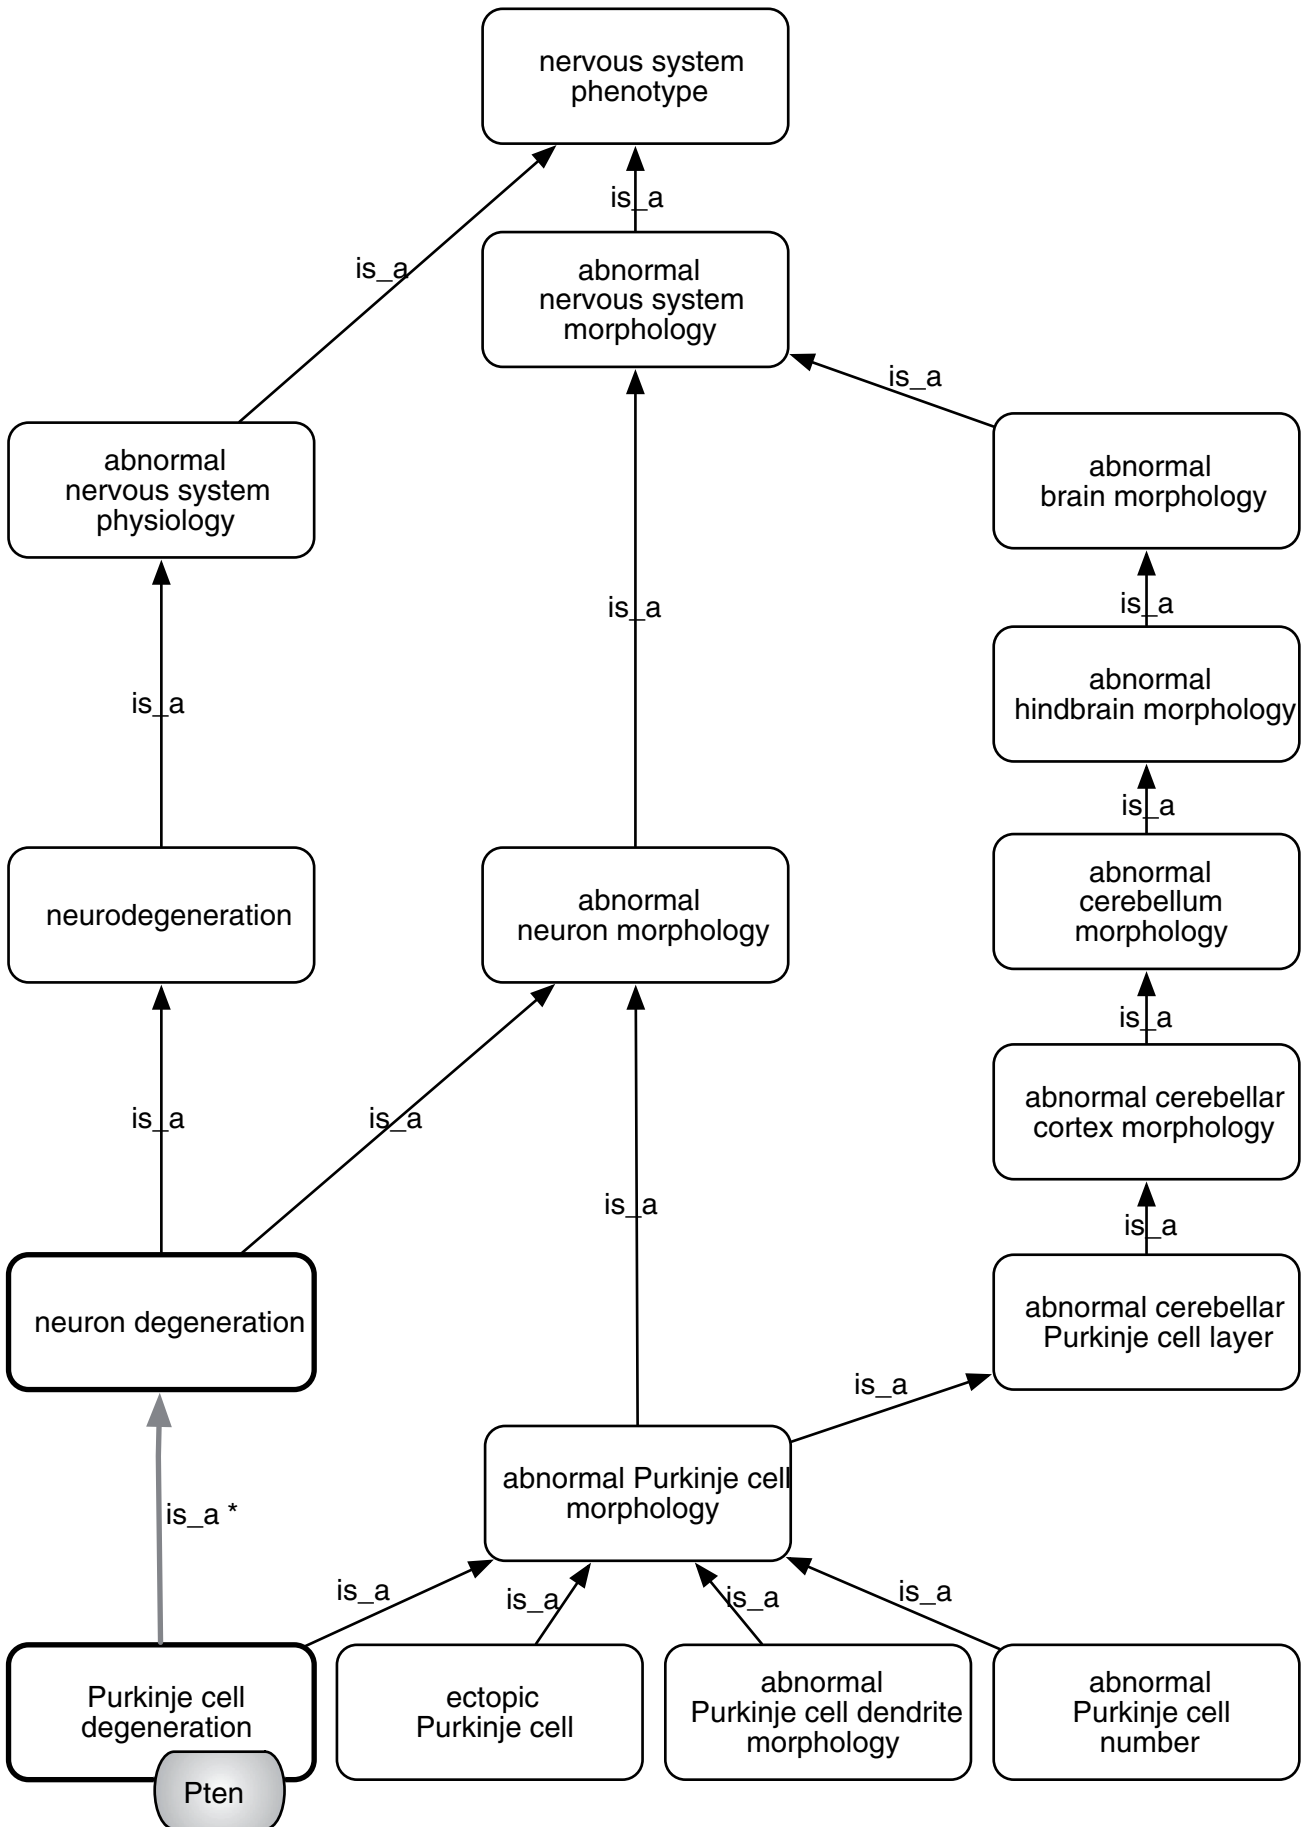

Supplement: 13059_2009_2295_MOESM2_ESM.pdf [file 13059_2009_2295_MOESM2_ESM.pdf]

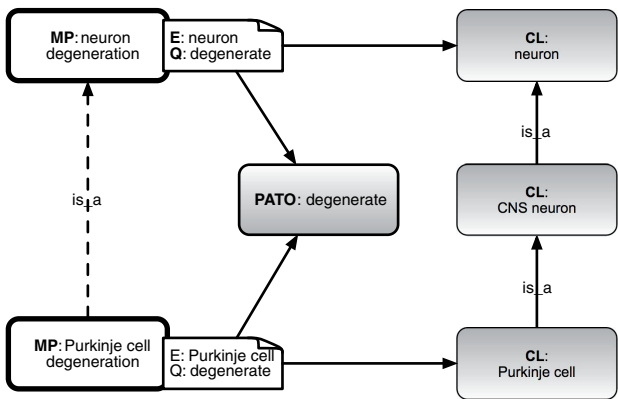

Supplement: 13059_2009_2295_MOESM3_ESM.pdf [file 13059_2009_2295_MOESM3_ESM.pdf]
